# Supplementary material for: Convergent evolution and topologically disruptive polymorphisms among multidrug-resistant tuberculosis in Peru
Source: PLoS One. 2017 Dec 27;12(12):e0189838. doi: 10.1371/journal.pone.0189838 (PMC5744980; doi:10.1371/journal.pone.0189838)
Supplement: S1 Table — (XLSX) [file pone.0189838.s005.xlsx]

## Sheet: Sheet1
TAXA	SAMPLE YEAR	AGE	SEX	HIV STATUS	PREVIOUS TB	RESISTANT/SUSCEPTIBLE	SMEAR POSITIVE/NEGATIVE
14722_6#1_H37Rv	2008-03-09	40	M	NEGATIVE	YES	RESISTANT	POSITIVE
14722_6#10_H37Rv	2009-11-02	UNKNOWN	F	NEGATIVE	NO	RESISTANT	POSITIVE
14722_6#11_H37Rv	2008-11-11	29	F	NEGATIVE	NO	RESISTANT	POSITIVE
14722_6#12_H37Rv	2009-02-03	29	M	NEGATIVE	YES	RESISTANT	POSITIVE
14722_6#13_H37Rv	2009-12-02	35	F	NEGATIVE	NO	RESISTANT	POSITIVE
14722_6#14_H37Rv	2009-02-13	24	M	NEGATIVE	NO	RESISTANT	POSITIVE
14722_6#15_H37Rv	2008-11-19	41	M	NEGATIVE	NO	RESISTANT	POSITIVE
14722_6#16_H37Rv	2008-11-23	42	F	NEGATIVE	YES	RESISTANT	POSITIVE
14722_6#17_H37Rv	2008-11-25	47	F	NEGATIVE	YES	RESISTANT	POSITIVE
14722_6#18_H37Rv	2009-11-03	26	F	NEGATIVE	NO	RESISTANT	POSITIVE
14722_6#19_H37Rv	2009-03-13	39	M	NEGATIVE	NO	RESISTANT	POSITIVE
14722_6#2_H37Rv	2009-08-01	76	M	NEGATIVE	YES	RESISTANT	POSITIVE
14722_6#20_H37Rv	2008-10-10	65	M	NEGATIVE	NO	SUSCEPTIBLE	POSITIVE
14722_6#21_H37Rv	2009-03-16	18	M	NEGATIVE	NO	SUSCEPTIBLE	POSITIVE
14722_6#22_H37Rv	2009-03-18	UNKNOWN	M	NEGATIVE	NO	SUSCEPTIBLE	POSITIVE
14722_6#23_H37Rv	2009-03-13	29	M	NEGATIVE	NO	SUSCEPTIBLE	POSITIVE
14722_6#24_H37Rv	2009-03-18	51	F	NEGATIVE	YES	SUSCEPTIBLE	POSITIVE
14722_6#25_H37Rv	2009-03-31	36	M	POSITIVE	NO	SUSCEPTIBLE	NEGATIVE
14722_6#26_H37Rv	2009-08-04	18	M	NEGATIVE	NO	SUSCEPTIBLE	POSITIVE
14722_6#27_H37Rv	2009-04-17	UNKNOWN	F	NEGATIVE	NO	SUSCEPTIBLE	POSITIVE
14722_6#28_H37Rv	2009-04-24	52	F	NEGATIVE	YES	SUSCEPTIBLE	POSITIVE
14722_6#29_H37Rv	2009-04-24	30	M	NEGATIVE	YES	SUSCEPTIBLE	POSITIVE
14722_6#3_H37Rv	2009-01-13	36	M	NEGATIVE	YES	SUSCEPTIBLE	POSITIVE
14722_6#30_H37Rv	2009-04-28	80	F	NEGATIVE	NO	SUSCEPTIBLE	POSITIVE
14722_6#31_H37Rv	2009-04-27	75	M	NEGATIVE	YES	SUSCEPTIBLE	POSITIVE
14722_6#32_H37Rv	2009-04-27	29	F	POSITIVE	NO	SUSCEPTIBLE	POSITIVE
14722_6#33_H37Rv	2009-04-20	65	M	NEGATIVE	NO	SUSCEPTIBLE	POSITIVE
14722_6#34_H37Rv	2009-04-29	71	M	NEGATIVE	NO	SUSCEPTIBLE	NEGATIVE
14722_6#35_H37Rv	2009-04-20	26	F	NEGATIVE	YES	SUSCEPTIBLE	POSITIVE
14722_6#36_H37Rv	2009-04-22	30	F	NEGATIVE	NO	SUSCEPTIBLE	NEGATIVE
14722_6#37_H37Rv	2009-05-11	46	M	NEGATIVE	NO	SUSCEPTIBLE	NEGATIVE
14722_6#38_H37Rv	2009-04-28	22	M	NEGATIVE	YES	SUSCEPTIBLE	POSITIVE
14722_6#39_H37Rv	2009-05-11	56	F	NEGATIVE	NO	SUSCEPTIBLE	POSITIVE
14722_6#4_H37Rv	2009-01-13	20	F	NEGATIVE	NO	SUSCEPTIBLE	POSITIVE
14722_6#40_H37Rv	2009-04-30	29	M	NEGATIVE	YES	SUSCEPTIBLE	POSITIVE
14722_6#41_H37Rv	2009-04-27	43	M	NEGATIVE	NO	SUSCEPTIBLE	POSITIVE
14722_6#42_H37Rv	2009-05-20	30	M	NEGATIVE	NO	SUSCEPTIBLE	POSITIVE
14722_6#43_H37Rv	2009-05-20	46	F	NEGATIVE	YES	SUSCEPTIBLE	POSITIVE
14722_6#44_H37Rv	2009-05-30	52	M	NEGATIVE	NO	RESISTANT	NEGATIVE
14722_6#45_H37Rv	2009-06-03	33	M	NEGATIVE	NO	RESISTANT	POSITIVE
14722_6#46_H37Rv	2009-06-10	77	F	NEGATIVE	YES	RESISTANT	POSITIVE
14722_6#47_H37Rv	2009-06-13	30	M	NEGATIVE	YES	RESISTANT	POSITIVE
14722_6#48_H37Rv	2009-05-13	30	M	NEGATIVE	NO	SUSCEPTIBLE	POSITIVE
14722_6#49_H37Rv	2009-05-18	83	F	NEGATIVE	NO	SUSCEPTIBLE	POSITIVE
14722_6#5_H37Rv	2009-01-22	51	M	NEGATIVE	NO	RESISTANT	POSITIVE
14722_6#50_H37Rv	2009-06-19	34	F	NEGATIVE	YES	RESISTANT	NEGATIVE
14722_6#51_H37Rv	2009-06-23	43	F	NEGATIVE	YES	RESISTANT	NEGATIVE
14722_6#52_H37Rv	2009-07-06	23	F	NEGATIVE	YES	RESISTANT	POSITIVE
14722_6#53_H37Rv	2009-07-13	32	M	NEGATIVE	NO	RESISTANT	POSITIVE
14722_6#54_H37Rv	2009-04-06	60	M	NEGATIVE	YES	RESISTANT	POSITIVE
14722_6#55_H37Rv	2009-08-01	UNKNOWN	M	NEGATIVE	NO	RESISTANT	POSITIVE
14722_6#56_H37Rv	2009-09-21	42	F	NEGATIVE	YES	RESISTANT	POSITIVE
14722_6#57_H37Rv	2009-07-01	23	M	NEGATIVE	YES	RESISTANT	NEGATIVE
14722_6#58_H37Rv	2009-07-17	22	M	NEGATIVE	NO	RESISTANT	POSITIVE
14722_6#59_H37Rv	2009-06-26	33	M	NEGATIVE	NO	RESISTANT	NEGATIVE
14722_6#6_H37Rv	2009-01-20	20	F	NEGATIVE	NO	RESISTANT	POSITIVE
14722_6#60_H37Rv	2009-09-18	UNKNOWN	M	NEGATIVE	NO	RESISTANT	NEGATIVE
14722_6#61_H37Rv	2009-06-19	32	F	NEGATIVE	YES	RESISTANT	POSITIVE
14722_6#62_H37Rv	2009-07-08	35	F	NEGATIVE	NO	RESISTANT	POSITIVE
14722_6#63_H37Rv	2009-09-24	55	M	NEGATIVE	YES	RESISTANT	POSITIVE
14722_6#64_H37Rv	2009-11-07	37	M	NEGATIVE	NO	RESISTANT	POSITIVE
14722_6#65_H37Rv	2009-10-19	57	M	NEGATIVE	YES	RESISTANT	POSITIVE
14722_6#66_H37Rv	2009-12-08	18	M	NEGATIVE	NO	RESISTANT	NEGATIVE
14722_6#67_H37Rv	2009-07-01	19	M	NEGATIVE	YES	RESISTANT	POSITIVE
14722_6#68_H37Rv	2009-11-18	56	M	NEGATIVE	YES	RESISTANT	POSITIVE
14722_6#69_H37Rv	2009-08-21	30	F	NEGATIVE	NO	SUSCEPTIBLE	POSITIVE
14722_6#7_H37Rv	2009-10-28	23	F	NEGATIVE	NO	RESISTANT	POSITIVE
14722_6#70_H37Rv	2009-08-26	36	F	NEGATIVE	NO	RESISTANT	POSITIVE
14722_6#71_H37Rv	2009-08-24	30	F	NEGATIVE	YES	SUSCEPTIBLE	POSITIVE
14722_6#72_H37Rv	2009-12-01	30	M	NEGATIVE	YES	RESISTANT	POSITIVE
14722_6#73_H37Rv	2009-12-15	53	F	NEGATIVE	YES	RESISTANT	POSITIVE
14722_6#74_H37Rv	2009-09-25	25	M	NEGATIVE	NO	RESISTANT	POSITIVE
14722_6#75_H37Rv	2009-10-23	26	M	NEGATIVE	YES	RESISTANT	POSITIVE
14722_6#76_H37Rv	2009-10-27	30	M	NEGATIVE	NO	RESISTANT	NEGATIVE
14722_6#77_H37Rv	2009-11-03	22	F	NEGATIVE	NO	RESISTANT	UNKNOWN
14722_6#78_H37Rv	2009-11-04	23	M	NEGATIVE	NO	RESISTANT	POSITIVE
14722_6#79_H37Rv	2009-11-21	45	M	NEGATIVE	YES	RESISTANT	POSITIVE
14722_6#8_H37Rv	2009-01-22	61	M	NEGATIVE	NO	RESISTANT	POSITIVE
14722_6#80_H37Rv	2009-12-29	20	M	NEGATIVE	NO	RESISTANT	POSITIVE
14722_6#81_H37Rv	2010-01-02	21	F	NEGATIVE	YES	SUSCEPTIBLE	POSITIVE
14722_6#82_H37Rv	2009-12-28	51	M	NEGATIVE	YES	RESISTANT	POSITIVE
14722_6#83_H37Rv	2010-01-08	36	M	NEGATIVE	NO	SUSCEPTIBLE	NEGATIVE
14722_6#84_H37Rv	2009-09-18	20	M	NEGATIVE	NO	RESISTANT	POSITIVE
14722_6#85_H37Rv	2010-01-13	25	F	NEGATIVE	YES	RESISTANT	NEGATIVE
14722_6#86_H37Rv	2009-09-17	18	F	NEGATIVE	NO	RESISTANT	POSITIVE
14722_6#87_H37Rv	2009-09-15	46	F	NEGATIVE	YES	RESISTANT	POSITIVE
14722_6#88_H37Rv	2009-09-16	20	M	NEGATIVE	YES	RESISTANT	NEGATIVE
14722_6#89_H37Rv	2009-11-26	43	M	NEGATIVE	YES	RESISTANT	UNKNOWN
14722_6#9_H37Rv	2008-11-11	30	F	NEGATIVE	NO	RESISTANT	POSITIVE
14722_6#90_H37Rv	2009-11-27	24	M	NEGATIVE	NO	RESISTANT	POSITIVE
14722_6#91_H37Rv	2009-11-30	20	M	NEGATIVE	YES	RESISTANT	POSITIVE
14722_6#92_H37Rv	2009-12-30	20	M	NEGATIVE	YES	SUSCEPTIBLE	POSITIVE
14722_6#93_H37Rv	2009-12-28	38	M	NEGATIVE	NO	RESISTANT	POSITIVE
14722_6#94_H37Rv	2009-09-30	25	F	NEGATIVE	YES	RESISTANT	POSITIVE
14722_6#95_H37Rv	2009-12-29	26	F	NEGATIVE	YES	RESISTANT	POSITIVE
14722_7#1_H37Rv	2011-11-24	25	M	NEGATIVE	NO	RESISTANT	POSITIVE
14722_7#10_H37Rv	2012-05-07	24	M	NEGATIVE	YES	RESISTANT	POSITIVE
14722_7#11_H37Rv	2012-05-07	20	F	NEGATIVE	NO	RESISTANT	POSITIVE
14722_7#12_H37Rv	2012-05-10	53	M	NEGATIVE	NO	RESISTANT	UNKNOWN
14722_7#13_H37Rv	2012-04-03	29	F	NEGATIVE	NO	RESISTANT	NEGATIVE
14722_7#14_H37Rv	2012-07-07	30	M	NEGATIVE	NO	RESISTANT	POSITIVE
14722_7#15_H37Rv	2012-03-29	43	M	NEGATIVE	NO	RESISTANT	POSITIVE
14722_7#16_H37Rv	2012-06-06	21	M	NEGATIVE	NO	RESISTANT	POSITIVE
14722_7#17_H37Rv	2012-07-02	37	F	NEGATIVE	YES	RESISTANT	POSITIVE
14722_7#18_H37Rv	2012-06-28	28	F	NEGATIVE	NO	RESISTANT	POSITIVE
14722_7#19_H37Rv	2012-07-31	41	M	NEGATIVE	YES	RESISTANT	POSITIVE
14722_7#2_H37Rv	2011-11-11	42	M	NEGATIVE	NO	RESISTANT	POSITIVE
14722_7#20_H37Rv	2012-07-06	45	F	NEGATIVE	NO	RESISTANT	POSITIVE
14722_7#21_H37Rv	2012-06-11	32	F	NEGATIVE	NO	RESISTANT	POSITIVE
14722_7#22_H37Rv	2012-08-24	31	M	POSITIVE	NO	RESISTANT	POSITIVE
14722_7#23_H37Rv	2012-09-25	32	M	NEGATIVE	NO	RESISTANT	POSITIVE
14722_7#24_H37Rv	2012-09-04	39	M	NEGATIVE	NO	RESISTANT	POSITIVE
14722_7#25_H37Rv	2012-09-15	21	F	NEGATIVE	NO	RESISTANT	POSITIVE
14722_7#26_H37Rv	2009-05-05	17	M	NEGATIVE	NO	RESISTANT	POSITIVE
14722_7#27_H37Rv	2012-03-08	23	M	NEGATIVE	NO	RESISTANT	POSITIVE
14722_7#28_H37Rv	2012-08-29	17	M	NEGATIVE	NO	RESISTANT	POSITIVE
14722_7#29_H37Rv	2009-07-01	34	F	NEGATIVE	NO	RESISTANT	POSITIVE
14722_7#3_H37Rv	2011-11-30	41	F	NEGATIVE	NO	RESISTANT	NEGATIVE
14722_7#30_H37Rv	2008-12-19	38	M	NEGATIVE	NO	RESISTANT	POSITIVE
14722_7#31_H37Rv	2009-05-09	33	F	NEGATIVE	NO	RESISTANT	POSITIVE
14722_7#32_H37Rv	2009-09-29	49	M	NEGATIVE	YES	RESISTANT	POSITIVE
14722_7#33_H37Rv	2009-01-05	34	M	POSITIVE	NO	RESISTANT	POSITIVE
14722_7#34_H37Rv	2009-07-01	26	M	NEGATIVE	NO	RESISTANT	POSITIVE
14722_7#35_H37Rv	2009-07-01	42	M	NEGATIVE	YES	RESISTANT	POSITIVE
14722_7#36_H37Rv	2009-01-09	20	M	NEGATIVE	YES	RESISTANT	POSITIVE
14722_7#37_H37Rv	2008-10-20	30	M	NEGATIVE	NO	RESISTANT	POSITIVE
14722_7#38_H37Rv	2009-01-27	33	M	NEGATIVE	YES	RESISTANT	POSITIVE
14722_7#39_H37Rv	2008-10-24	26	F	NEGATIVE	YES	RESISTANT	POSITIVE
14722_7#4_H37Rv	2012-01-02	26	M	NEGATIVE	NO	RESISTANT	POSITIVE
14722_7#40_H37Rv	2008-10-31	33	M	NEGATIVE	YES	RESISTANT	POSITIVE
14722_7#41_H37Rv	2009-01-28	53	F	NEGATIVE	YES	RESISTANT	POSITIVE
14722_7#42_H37Rv	2008-03-10	40	M	NEGATIVE	NO	RESISTANT	POSITIVE
14722_7#43_H37Rv	2008-05-11	71	M	NEGATIVE	NO	RESISTANT	POSITIVE
14722_7#44_H37Rv	2009-01-29	26	M	NEGATIVE	NO	RESISTANT	POSITIVE
14722_7#45_H37Rv	2009-02-02	57	M	NEGATIVE	NO	RESISTANT	POSITIVE
14722_7#46_H37Rv	2009-09-03	32	M	NEGATIVE	NO	RESISTANT	POSITIVE
14722_7#47_H37Rv	2009-01-29	54	F	NEGATIVE	NO	RESISTANT	POSITIVE
14722_7#48_H37Rv	2009-02-04	28	F	NEGATIVE	YES	RESISTANT	POSITIVE
14722_7#49_H37Rv	2009-01-30	33	F	NEGATIVE	NO	RESISTANT	POSITIVE
14722_7#5_H37Rv	2011-12-26	14	F	NEGATIVE	NO	RESISTANT	POSITIVE
14722_7#50_H37Rv	2009-02-12	41	M	NEGATIVE	YES	RESISTANT	POSITIVE
14722_7#51_H37Rv	2008-11-24	19	F	NEGATIVE	NO	RESISTANT	POSITIVE
14722_7#52_H37Rv	2008-10-11	UNKNOWN	M	NEGATIVE	YES	RESISTANT	POSITIVE
14722_7#53_H37Rv	2009-02-26	57	F	NEGATIVE	YES	RESISTANT	POSITIVE
14722_7#54_H37Rv	2009-11-28	43	F	NEGATIVE	NO	RESISTANT	POSITIVE
14722_7#55_H37Rv	2009-02-06	75	M	NEGATIVE	NO	RESISTANT	POSITIVE
14722_7#56_H37Rv	2008-11-27	49	F	NEGATIVE	NO	RESISTANT	POSITIVE
14722_7#57_H37Rv	2009-01-12	42	M	NEGATIVE	NO	RESISTANT	POSITIVE
14722_7#58_H37Rv	2009-02-13	25	M	NEGATIVE	NO	RESISTANT	POSITIVE
14722_7#59_H37Rv	2008-05-12	UNKNOWN	F	NEGATIVE	YES	RESISTANT	POSITIVE
14722_7#6_H37Rv	2012-02-23	62	F	NEGATIVE	NO	RESISTANT	POSITIVE
14722_7#60_H37Rv	2008-09-12	23	M	NEGATIVE	YES	RESISTANT	POSITIVE
14722_7#61_H37Rv	2009-09-03	16	F	NEGATIVE	NO	RESISTANT	POSITIVE
14722_7#62_H37Rv	2009-02-28	27	M	NEGATIVE	NO	RESISTANT	POSITIVE
14722_7#63_H37Rv	2009-02-27	43	M	NEGATIVE	YES	RESISTANT	POSITIVE
14722_7#64_H37Rv	2009-12-03	47	M	NEGATIVE	YES	RESISTANT	POSITIVE
14722_7#65_H37Rv	2009-03-05	27	F	NEGATIVE	NO	RESISTANT	POSITIVE
14722_7#66_H37Rv	2009-03-09	21	M	NEGATIVE	NO	RESISTANT	POSITIVE
14722_7#67_H37Rv	2009-03-11	27	F	NEGATIVE	NO	RESISTANT	POSITIVE
14722_7#68_H37Rv	2009-03-21	28	F	NEGATIVE	NO	SUSCEPTIBLE	POSITIVE
14722_7#69_H37Rv	2009-03-11	39	M	NEGATIVE	NO	RESISTANT	NEGATIVE
14722_7#7_H37Rv	2011-11-28	22	M	POSITIVE	NO	RESISTANT	POSITIVE
14722_7#70_H37Rv	2009-03-18	UNKNOWN	M	NEGATIVE	NO	RESISTANT	POSITIVE
14722_7#71_H37Rv	2009-03-14	19	F	NEGATIVE	NO	RESISTANT	POSITIVE
14722_7#72_H37Rv	2009-03-04	46	F	NEGATIVE	YES	RESISTANT	POSITIVE
14722_7#73_H37Rv	2009-03-19	37	M	NEGATIVE	NO	SUSCEPTIBLE	POSITIVE
14722_7#74_H37Rv	2009-03-30	39	F	NEGATIVE	YES	RESISTANT	POSITIVE
14722_7#75_H37Rv	2009-03-31	35	F	NEGATIVE	NO	RESISTANT	NEGATIVE
14722_7#76_H37Rv	2009-03-30	81	M	NEGATIVE	NO	RESISTANT	POSITIVE
14722_7#77_H37Rv	2009-03-04	22	F	NEGATIVE	NO	RESISTANT	POSITIVE
14722_7#78_H37Rv	2009-04-06	23	F	NEGATIVE	NO	RESISTANT	POSITIVE
14722_7#79_H37Rv	2009-04-04	UNKNOWN	M	NEGATIVE	NO	RESISTANT	POSITIVE
14722_7#8_H37Rv	2011-12-28	64	F	NEGATIVE	NO	RESISTANT	POSITIVE
14722_7#80_H37Rv	2009-11-04	19	M	NEGATIVE	NO	RESISTANT	POSITIVE
14722_7#81_H37Rv	2009-04-13	55	M	NEGATIVE	YES	RESISTANT	POSITIVE
14722_7#82_H37Rv	2009-04-08	49	M	NEGATIVE	NO	RESISTANT	POSITIVE
14722_7#83_H37Rv	2009-04-13	46	F	NEGATIVE	NO	RESISTANT	POSITIVE
14722_7#84_H37Rv	2009-04-15	33	M	NEGATIVE	NO	RESISTANT	POSITIVE
14722_7#85_H37Rv	2009-04-15	21	M	NEGATIVE	NO	SUSCEPTIBLE	POSITIVE
14722_7#86_H37Rv	2009-04-21	18	M	NEGATIVE	NO	RESISTANT	NEGATIVE
14722_7#87_H37Rv	2009-04-17	29	M	NEGATIVE	YES	RESISTANT	POSITIVE
14722_7#88_H37Rv	2009-04-14	25	M	NEGATIVE	NO	RESISTANT	POSITIVE
14722_7#89_H37Rv	2009-04-23	74	F	NEGATIVE	NO	RESISTANT	POSITIVE
14722_7#9_H37Rv	2012-04-24	17	M	NEGATIVE	NO	RESISTANT	POSITIVE
14722_7#90_H37Rv	2009-04-16	39	M	NEGATIVE	NO	RESISTANT	POSITIVE
14722_7#91_H37Rv	2009-04-22	52	M	NEGATIVE	YES	RESISTANT	POSITIVE
14722_7#92_H37Rv	2009-04-29	62	M	POSITIVE	YES	SUSCEPTIBLE	NEGATIVE
14722_7#93_H37Rv	2009-04-24	46	M	NEGATIVE	YES	RESISTANT	POSITIVE
14722_7#94_H37Rv	2009-04-22	38	F	NEGATIVE	NO	RESISTANT	POSITIVE
14722_7#95_H37Rv	2009-10-12	19	M	NEGATIVE	NO	RESISTANT	POSITIVE
14722_8#1_H37Rv	2011-05-10	16	M	NEGATIVE	YES	RESISTANT	POSITIVE
14722_8#10_H37Rv	2011-08-12	22	M	NEGATIVE	NO	RESISTANT	POSITIVE
14722_8#11_H37Rv	2011-08-22	20	F	NEGATIVE	NO	RESISTANT	NEGATIVE
14722_8#12_H37Rv	2010-09-30	28	M	NEGATIVE	NO	RESISTANT	POSITIVE
14722_8#13_H37Rv	2011-05-31	31	M	NEGATIVE	NO	RESISTANT	POSITIVE
14722_8#14_H37Rv	2011-08-09	21	M	NEGATIVE	NO	RESISTANT	POSITIVE
14722_8#15_H37Rv	2011-08-17	18	M	NEGATIVE	NO	RESISTANT	POSITIVE
14722_8#16_H37Rv	2011-07-08	26	M	NEGATIVE	NO	RESISTANT	POSITIVE
14722_8#17_H37Rv	2011-08-18	29	F	NEGATIVE	YES	RESISTANT	POSITIVE
14722_8#18_H37Rv	2011-05-23	25	M	NEGATIVE	NO	RESISTANT	NEGATIVE
14722_8#19_H37Rv	2011-07-07	58	M	NEGATIVE	YES	RESISTANT	POSITIVE
14722_8#2_H37Rv	2011-05-21	59	M	NEGATIVE	YES	RESISTANT	POSITIVE
14722_8#20_H37Rv	2011-08-02	16	F	NEGATIVE	YES	RESISTANT	POSITIVE
14722_8#21_H37Rv	2011-04-14	76	M	NEGATIVE	YES	RESISTANT	POSITIVE
14722_8#22_H37Rv	2011-06-10	24	F	NEGATIVE	YES	RESISTANT	POSITIVE
14722_8#23_H37Rv	2010-04-28	26	F	NEGATIVE	YES	RESISTANT	POSITIVE
14722_8#24_H37Rv	2010-12-16	27	F	NEGATIVE	YES	RESISTANT	POSITIVE
14722_8#25_H37Rv	2011-08-03	19	M	NEGATIVE	NO	RESISTANT	POSITIVE
14722_8#26_H37Rv	2011-02-10	31	F	NEGATIVE	NO	RESISTANT	NEGATIVE
14722_8#27_H37Rv	2011-10-17	15	F	NEGATIVE	NO	RESISTANT	NEGATIVE
14722_8#28_H37Rv	2011-07-11	28	M	NEGATIVE	NO	RESISTANT	POSITIVE
14722_8#29_H37Rv	2011-08-02	25	M	NEGATIVE	NO	RESISTANT	POSITIVE
14722_8#3_H37Rv	2011-06-03	27	M	NEGATIVE	NO	RESISTANT	POSITIVE
14722_8#30_H37Rv	2011-09-15	16	M	NEGATIVE	NO	RESISTANT	POSITIVE
14722_8#31_H37Rv	2011-09-20	28	F	NEGATIVE	NO	RESISTANT	POSITIVE
14722_8#32_H37Rv	2011-09-20	22	M	NEGATIVE	NO	RESISTANT	NEGATIVE
14722_8#33_H37Rv	2011-09-30	25	M	NEGATIVE	NO	RESISTANT	POSITIVE
14722_8#34_H37Rv	2011-10-05	17	M	NEGATIVE	NO	RESISTANT	POSITIVE
14722_8#35_H37Rv	2011-09-26	61	F	NEGATIVE	NO	RESISTANT	POSITIVE
14722_8#36_H37Rv	2011-08-23	16	M	NEGATIVE	NO	RESISTANT	POSITIVE
14722_8#37_H37Rv	2011-10-23	28	F	NEGATIVE	YES	RESISTANT	POSITIVE
14722_8#38_H37Rv	2011-10-26	19	F	NEGATIVE	NO	RESISTANT	POSITIVE
14722_8#39_H37Rv	2011-10-06	23	M	NEGATIVE	NO	RESISTANT	POSITIVE
14722_8#4_H37Rv	2011-06-01	34	M	NEGATIVE	NO	RESISTANT	POSITIVE
14722_8#40_H37Rv	2011-10-28	25	M	NEGATIVE	NO	RESISTANT	POSITIVE
14722_8#41_H37Rv	2011-11-16	22	M	NEGATIVE	NO	RESISTANT	POSITIVE
14722_8#42_H37Rv	2011-11-16	22	F	NEGATIVE	NO	RESISTANT	POSITIVE
14722_8#43_H37Rv	2011-11-26	36	M	NEGATIVE	NO	RESISTANT	POSITIVE
14722_8#44_H37Rv	2011-12-14	49	F	NEGATIVE	NO	RESISTANT	POSITIVE
14722_8#45_H37Rv	2011-11-17	66	F	NEGATIVE	NO	RESISTANT	POSITIVE
14722_8#46_H37Rv	2011-09-22	21	M	NEGATIVE	NO	RESISTANT	POSITIVE
14722_8#47_H37Rv	2011-09-09	53	M	NEGATIVE	YES	RESISTANT	POSITIVE
14722_8#48_H37Rv	2011-09-10	27	F	NEGATIVE	YES	RESISTANT	POSITIVE
14722_8#49_H37Rv	2011-09-09	45	M	POSITIVE	NO	RESISTANT	POSITIVE
14722_8#5_H37Rv	2011-06-13	63	F	NEGATIVE	YES	RESISTANT	NEGATIVE
14722_8#50_H37Rv	2011-11-29	35	M	NEGATIVE	YES	RESISTANT	POSITIVE
14722_8#51_H37Rv	2011-10-17	30	M	NEGATIVE	NO	RESISTANT	POSITIVE
14722_8#52_H37Rv	2011-08-05	79	F	NEGATIVE	YES	RESISTANT	POSITIVE
14722_8#53_H37Rv	2011-08-19	21	F	NEGATIVE	NO	RESISTANT	POSITIVE
14722_8#54_H37Rv	2010-12-28	21	M	NEGATIVE	NO	RESISTANT	POSITIVE
14722_8#55_H37Rv	2011-12-09	32	M	NEGATIVE	NO	RESISTANT	POSITIVE
14722_8#56_H37Rv	2011-12-12	46	M	NEGATIVE	YES	RESISTANT	POSITIVE
14722_8#57_H37Rv	2011-12-30	30	F	NEGATIVE	YES	RESISTANT	POSITIVE
14722_8#58_H37Rv	2012-01-03	13	F	NEGATIVE	NO	RESISTANT	POSITIVE
14722_8#59_H37Rv	2012-01-06	19	F	NEGATIVE	NO	RESISTANT	POSITIVE
14722_8#6_H37Rv	2011-06-24	21	M	NEGATIVE	YES	RESISTANT	POSITIVE
14722_8#60_H37Rv	2011-12-20	24	M	NEGATIVE	NO	RESISTANT	POSITIVE
14722_8#61_H37Rv	2012-01-18	37	M	POSITIVE	YES	RESISTANT	POSITIVE
14722_8#62_H37Rv	2008-10-10	54	M	NEGATIVE	NO	RESISTANT	POSITIVE
14722_8#63_H37Rv	2011-09-23	43	M	POSITIVE	NO	RESISTANT	POSITIVE
14722_8#64_H37Rv	2007-11-10	26	M	NEGATIVE	YES	RESISTANT	UNKNOWN
14722_8#65_H37Rv	2012-01-24	22	M	NEGATIVE	NO	RESISTANT	POSITIVE
14722_8#66_H37Rv	2011-12-22	37	F	NEGATIVE	YES	RESISTANT	NEGATIVE
14722_8#67_H37Rv	2011-11-08	47	M	NEGATIVE	NO	RESISTANT	POSITIVE
14722_8#68_H37Rv	2011-11-23	66	M	NEGATIVE	NO	RESISTANT	POSITIVE
14722_8#69_H37Rv	2012-02-08	17	M	NEGATIVE	NO	RESISTANT	POSITIVE
14722_8#7_H37Rv	2011-06-27	18	F	NEGATIVE	YES	RESISTANT	POSITIVE
14722_8#70_H37Rv	2012-02-23	33	F	NEGATIVE	YES	RESISTANT	POSITIVE
14722_8#71_H37Rv	2011-12-13	29	M	NEGATIVE	NO	RESISTANT	NEGATIVE
14722_8#72_H37Rv	2011-12-13	33	M	POSITIVE	NO	RESISTANT	POSITIVE
14722_8#73_H37Rv	2011-12-26	29	M	NEGATIVE	NO	RESISTANT	POSITIVE
14722_8#74_H37Rv	2011-12-20	18	F	NEGATIVE	YES	RESISTANT	POSITIVE
14722_8#75_H37Rv	2012-03-05	45	M	POSITIVE	YES	RESISTANT	POSITIVE
14722_8#76_H37Rv	2012-02-20	42	M	POSITIVE	NO	RESISTANT	POSITIVE
14722_8#77_H37Rv	2012-03-05	24	F	NEGATIVE	NO	RESISTANT	POSITIVE
14722_8#78_H37Rv	2012-04-04	54	F	NEGATIVE	NO	RESISTANT	POSITIVE
14722_8#79_H37Rv	2012-03-09	34	F	POSITIVE	NO	RESISTANT	POSITIVE
14722_8#8_H37Rv	2011-07-06	36	M	NEGATIVE	YES	RESISTANT	POSITIVE
14722_8#80_H37Rv	2012-03-29	28	M	NEGATIVE	YES	RESISTANT	POSITIVE
14722_8#81_H37Rv	2012-04-13	31	M	NEGATIVE	NO	RESISTANT	NEGATIVE
14722_8#82_H37Rv	2012-01-31	25	M	NEGATIVE	NO	RESISTANT	POSITIVE
14722_8#83_H37Rv	2012-04-28	48	M	POSITIVE	NO	RESISTANT	NEGATIVE
14722_8#84_H37Rv	2012-05-05	20	F	NEGATIVE	NO	RESISTANT	POSITIVE
14722_8#85_H37Rv	2012-05-09	21	M	NEGATIVE	YES	RESISTANT	POSITIVE
14722_8#86_H37Rv	2012-05-15	20	F	NEGATIVE	NO	RESISTANT	POSITIVE
14722_8#87_H37Rv	2012-06-01	20	F	NEGATIVE	NO	RESISTANT	POSITIVE
14722_8#88_H37Rv	2012-07-07	56	F	NEGATIVE	NO	RESISTANT	POSITIVE
14722_8#89_H37Rv	2012-07-17	33	M	NEGATIVE	YES	RESISTANT	POSITIVE
14722_8#9_H37Rv	2006-07-27	28	M	NEGATIVE	YES	RESISTANT	POSITIVE
14722_8#90_H37Rv	2012-08-22	23	M	NEGATIVE	YES	RESISTANT	NEGATIVE
14722_8#91_H37Rv	2012-09-12	22	M	NEGATIVE	NO	RESISTANT	POSITIVE
14722_8#92_H37Rv	2011-05-23	21	M	NEGATIVE	YES	RESISTANT	NEGATIVE
14722_8#93_H37Rv	2011-02-12	29	M	NEGATIVE	NO	RESISTANT	POSITIVE
14722_8#94_H37Rv	2011-02-17	15	M	NEGATIVE	YES	RESISTANT	POSITIVE
14722_8#95_H37Rv	2012-06-05	23	M	NEGATIVE	NO	RESISTANT	NEGATIVE
14892_2#1_H37Rv	2009-04-23	55	M	NEGATIVE	YES	RESISTANT	POSITIVE
14892_2#10_H37Rv	2009-12-05	39	M	NEGATIVE	NO	RESISTANT	POSITIVE
14892_2#11_H37Rv	2009-06-02	32	F	NEGATIVE	NO	RESISTANT	POSITIVE
14892_2#12_H37Rv	2009-05-20	24	M	NEGATIVE	YES	RESISTANT	POSITIVE
14892_2#15_H37Rv	2009-07-22	20	F	NEGATIVE	YES	RESISTANT	POSITIVE
14892_2#16_H37Rv	2009-07-02	31	M	NEGATIVE	YES	RESISTANT	POSITIVE
14892_2#17_H37Rv	2009-07-07	51	M	NEGATIVE	YES	RESISTANT	POSITIVE
14892_2#18_H37Rv	2009-01-06	26	M	NEGATIVE	NO	RESISTANT	POSITIVE
14892_2#2_H37Rv	2009-04-05	21	M	NEGATIVE	NO	RESISTANT	POSITIVE
14892_2#20_H37Rv	2009-05-06	20	M	NEGATIVE	NO	SUSCEPTIBLE	POSITIVE
14892_2#21_H37Rv	2009-08-08	UNKNOWN	M	NEGATIVE	YES	RESISTANT	POSITIVE
14892_2#22_H37Rv	2009-08-06	22	M	NEGATIVE	NO	RESISTANT	POSITIVE
14892_2#23_H37Rv	2009-11-06	55	M	NEGATIVE	YES	RESISTANT	POSITIVE
14892_2#25_H37Rv	2009-06-16	34	M	NEGATIVE	NO	SUSCEPTIBLE	POSITIVE
14892_2#26_H37Rv	2009-12-08	29	M	NEGATIVE	NO	RESISTANT	POSITIVE
14892_2#27_H37Rv	2009-06-24	55	F	NEGATIVE	NO	RESISTANT	POSITIVE
14892_2#28_H37Rv	2009-06-30	16	F	NEGATIVE	NO	RESISTANT	POSITIVE
14892_2#29_H37Rv	2009-06-26	41	M	NEGATIVE	YES	RESISTANT	POSITIVE
14892_2#30_H37Rv	2009-07-07	20	M	NEGATIVE	YES	RESISTANT	POSITIVE
14892_2#31_H37Rv	2009-06-30	71	M	NEGATIVE	NO	RESISTANT	POSITIVE
14892_2#32_H37Rv	2009-09-17	55	F	NEGATIVE	YES	RESISTANT	NEGATIVE
14892_2#33_H37Rv	2009-01-07	52	M	NEGATIVE	YES	RESISTANT	POSITIVE
14892_2#34_H37Rv	2009-06-26	28	F	NEGATIVE	YES	RESISTANT	POSITIVE
14892_2#35_H37Rv	2009-10-19	47	F	NEGATIVE	NO	RESISTANT	POSITIVE
14892_2#36_H37Rv	2009-06-26	37	F	NEGATIVE	NO	RESISTANT	POSITIVE
14892_2#37_H37Rv	2009-01-08	33	M	NEGATIVE	NO	RESISTANT	POSITIVE
14892_2#39_H37Rv	2009-08-25	21	M	NEGATIVE	YES	RESISTANT	POSITIVE
14892_2#4_H37Rv	2009-05-19	23	M	NEGATIVE	NO	RESISTANT	POSITIVE
14892_2#40_H37Rv	2009-08-26	17	M	NEGATIVE	NO	RESISTANT	NEGATIVE
14892_2#41_H37Rv	2009-09-24	25	F	NEGATIVE	NO	RESISTANT	POSITIVE
14892_2#42_H37Rv	2009-09-30	28	F	NEGATIVE	YES	RESISTANT	POSITIVE
14892_2#43_H37Rv	2009-12-10	24	M	NEGATIVE	NO	RESISTANT	POSITIVE
14892_2#44_H37Rv	2009-08-26	21	M	NEGATIVE	NO	SUSCEPTIBLE	POSITIVE
14892_2#45_H37Rv	2010-01-28	29	M	NEGATIVE	YES	RESISTANT	POSITIVE
14892_2#46_H37Rv	2010-02-05	25	F	NEGATIVE	NO	RESISTANT	NEGATIVE
14892_2#48_H37Rv	2010-02-01	25	F	NEGATIVE	NO	RESISTANT	POSITIVE
14892_2#49_H37Rv	2010-02-12	63	F	NEGATIVE	YES	RESISTANT	POSITIVE
14892_2#5_H37Rv	2009-05-05	27	M	NEGATIVE	YES	RESISTANT	POSITIVE
14892_2#50_H37Rv	2009-11-13	29	F	NEGATIVE	NO	RESISTANT	POSITIVE
14892_2#51_H37Rv	2009-11-11	20	F	NEGATIVE	YES	RESISTANT	POSITIVE
14892_2#52_H37Rv	2010-02-17	32	M	NEGATIVE	YES	RESISTANT	POSITIVE
14892_2#53_H37Rv	2009-11-23	39	M	NEGATIVE	NO	RESISTANT	POSITIVE
14892_2#54_H37Rv	2010-01-25	54	M	NEGATIVE	NO	RESISTANT	POSITIVE
14892_2#57_H37Rv	2009-07-18	23	M	NEGATIVE	NO	RESISTANT	POSITIVE
14892_2#58_H37Rv	2009-07-24	23	F	NEGATIVE	NO	RESISTANT	POSITIVE
14892_2#59_H37Rv	2009-08-13	31	M	NEGATIVE	NO	RESISTANT	NEGATIVE
14892_2#60_H37Rv	2009-08-25	33	F	NEGATIVE	NO	RESISTANT	POSITIVE
14892_2#61_H37Rv	2009-10-13	39	M	NEGATIVE	YES	RESISTANT	POSITIVE
14892_2#63_H37Rv	2011-02-08	25	M	NEGATIVE	NO	RESISTANT	POSITIVE
14892_2#64_H37Rv	2011-06-10	20	M	NEGATIVE	YES	RESISTANT	POSITIVE
14892_2#65_H37Rv	2010-08-04	14	M	NEGATIVE	YES	RESISTANT	POSITIVE
14892_2#66_H37Rv	2011-02-03	42	F	NEGATIVE	NO	RESISTANT	UNKNOWN
14892_2#67_H37Rv	2011-02-17	17	F	NEGATIVE	YES	RESISTANT	POSITIVE
14892_2#68_H37Rv	2009-09-05	35	M	POSITIVE	NO	RESISTANT	POSITIVE
14892_2#69_H37Rv	2010-12-09	67	F	NEGATIVE	NO	RESISTANT	POSITIVE
14892_2#7_H37Rv	2009-09-05	25	F	NEGATIVE	NO	RESISTANT	POSITIVE
14892_2#70_H37Rv	2010-12-14	27	M	NEGATIVE	NO	RESISTANT	POSITIVE
14892_2#71_H37Rv	2010-11-29	25	F	NEGATIVE	NO	RESISTANT	POSITIVE
14892_2#72_H37Rv	2009-06-23	43	F	NEGATIVE	YES	RESISTANT	POSITIVE
14892_2#73_H37Rv	2010-12-21	50	M	NEGATIVE	NO	RESISTANT	POSITIVE
14892_2#74_H37Rv	2011-01-10	28	F	NEGATIVE	YES	RESISTANT	POSITIVE
14892_2#75_H37Rv	2009-12-22	38	M	NEGATIVE	YES	RESISTANT	POSITIVE
14892_2#76_H37Rv	2011-01-04	16	M	NEGATIVE	YES	RESISTANT	POSITIVE
14892_2#77_H37Rv	2011-02-12	23	M	NEGATIVE	NO	RESISTANT	NEGATIVE
14892_2#78_H37Rv	2011-05-21	24	F	NEGATIVE	NO	RESISTANT	NEGATIVE
14892_2#79_H37Rv	2011-05-20	39	F	NEGATIVE	YES	RESISTANT	POSITIVE
14892_2#8_H37Rv	2009-05-28	22	M	NEGATIVE	NO	RESISTANT	NEGATIVE
14892_2#80_H37Rv	2011-06-15	58	M	NEGATIVE	YES	RESISTANT	POSITIVE
14892_2#81_H37Rv	2011-06-11	31	F	NEGATIVE	NO	RESISTANT	POSITIVE
14892_2#82_H37Rv	2011-06-17	34	F	NEGATIVE	YES	RESISTANT	POSITIVE
14892_2#83_H37Rv	2011-01-07	30	M	NEGATIVE	NO	RESISTANT	POSITIVE
14892_2#84_H37Rv	2011-01-28	18	M	NEGATIVE	YES	RESISTANT	POSITIVE
14892_2#85_H37Rv	2011-02-05	25	M	NEGATIVE	NO	RESISTANT	POSITIVE
14892_2#86_H37Rv	2011-02-17	34	F	NEGATIVE	YES	RESISTANT	POSITIVE
14892_2#88_H37Rv	2011-09-03	44	M	POSITIVE	YES	RESISTANT	POSITIVE
14892_2#89_H37Rv	2011-04-03	34	F	NEGATIVE	NO	RESISTANT	POSITIVE
14892_2#9_H37Rv	2009-09-05	29	F	NEGATIVE	YES	RESISTANT	POSITIVE
14892_2#90_H37Rv	2011-04-06	19	M	NEGATIVE	NO	RESISTANT	POSITIVE
14892_2#91_H37Rv	2011-04-08	15	M	NEGATIVE	NO	RESISTANT	POSITIVE
14892_2#92_H37Rv	2011-04-24	17	M	NEGATIVE	YES	RESISTANT	POSITIVE
14892_2#93_H37Rv	2011-04-27	31	M	NEGATIVE	YES	RESISTANT	POSITIVE
14892_2#94_H37Rv	2011-04-29	21	M	NEGATIVE	NO	RESISTANT	POSITIVE
14892_2#95_H37Rv	2011-05-09	31	M	NEGATIVE	NO	RESISTANT	POSITIVE
14893_2#1_H37Rv	2009-09-30	25	F	NEGATIVE	NO	RESISTANT	POSITIVE
14893_2#10_H37Rv	2009-09-09	46	M	NEGATIVE	NO	RESISTANT	POSITIVE
14893_2#11_H37Rv	2010-01-12	30	F	NEGATIVE	YES	RESISTANT	POSITIVE
14893_2#12_H37Rv	2009-09-16	22	F	NEGATIVE	NO	RESISTANT	POSITIVE
14893_2#13_H37Rv	2010-01-22	43	F	NEGATIVE	YES	RESISTANT	POSITIVE
14893_2#14_H37Rv	2009-09-30	15	M	NEGATIVE	YES	RESISTANT	POSITIVE
14893_2#15_H37Rv	2010-02-03	84	F	NEGATIVE	YES	RESISTANT	POSITIVE
14893_2#16_H37Rv	2010-02-02	45	M	NEGATIVE	NO	RESISTANT	POSITIVE
14893_2#17_H37Rv	2010-02-03	28	M	NEGATIVE	YES	RESISTANT	NEGATIVE
14893_2#18_H37Rv	2009-10-16	28	M	NEGATIVE	NO	RESISTANT	POSITIVE
14893_2#19_H37Rv	2010-02-03	25	M	NEGATIVE	YES	RESISTANT	POSITIVE
14893_2#2_H37Rv	2010-01-05	20	M	NEGATIVE	NO	SUSCEPTIBLE	POSITIVE
14893_2#20_H37Rv	2009-11-09	22	M	NEGATIVE	NO	RESISTANT	POSITIVE
14893_2#21_H37Rv	2009-09-09	39	M	NEGATIVE	NO	RESISTANT	POSITIVE
14893_2#22_H37Rv	2010-01-16	34	F	NEGATIVE	YES	RESISTANT	POSITIVE
14893_2#23_H37Rv	2009-10-16	33	M	NEGATIVE	NO	RESISTANT	POSITIVE
14893_2#24_H37Rv	2009-10-23	47	M	NEGATIVE	NO	RESISTANT	POSITIVE
14893_2#25_H37Rv	2010-01-29	19	F	NEGATIVE	NO	RESISTANT	POSITIVE
14893_2#26_H37Rv	2010-02-02	29	F	NEGATIVE	NO	RESISTANT	POSITIVE
14893_2#27_H37Rv	2010-02-03	36	M	NEGATIVE	YES	RESISTANT	NEGATIVE
14893_2#28_H37Rv	UNKNOWN	33	F	NEGATIVE	YES	UNKNOWN	POSITIVE
14893_2#29_H37Rv	2009-10-11	74	M	NEGATIVE	NO	RESISTANT	POSITIVE
14893_2#3_H37Rv	2010-01-04	30	M	POSITIVE	NO	SUSCEPTIBLE	POSITIVE
14893_2#30_H37Rv	2010-02-11	29	F	NEGATIVE	NO	RESISTANT	POSITIVE
14893_2#31_H37Rv	2009-10-26	61	M	NEGATIVE	YES	SUSCEPTIBLE	POSITIVE
14893_2#32_H37Rv	2010-01-02	27	F	NEGATIVE	NO	RESISTANT	POSITIVE
14893_2#33_H37Rv	2009-11-14	UNKNOWN		NEGATIVE	NO	RESISTANT	POSITIVE
14893_2#34_H37Rv	2009-11-13	28	F	NEGATIVE	NO	RESISTANT	POSITIVE
14893_2#35_H37Rv	2010-02-11	33	M	NEGATIVE	YES	RESISTANT	POSITIVE
14893_2#36_H37Rv	2009-11-20	27	F	NEGATIVE	NO	RESISTANT	POSITIVE
14893_2#37_H37Rv	2010-02-18	61	M	NEGATIVE	YES	RESISTANT	POSITIVE
14893_2#38_H37Rv	2010-02-19	40	M	NEGATIVE	NO	RESISTANT	POSITIVE
14893_2#39_H37Rv	2010-02-17	24	F	NEGATIVE	YES	RESISTANT	POSITIVE
14893_2#4_H37Rv	2009-10-09	UNKNOWN	M	NEGATIVE	NO	RESISTANT	POSITIVE
14893_2#40_H37Rv	2009-07-30	37	F	NEGATIVE	NO	RESISTANT	POSITIVE
14893_2#41_H37Rv	2009-11-17	47	F	NEGATIVE	NO	RESISTANT	POSITIVE
14893_2#42_H37Rv	2009-11-21	45	M	NEGATIVE	YES	RESISTANT	POSITIVE
14893_2#43_H37Rv	2009-11-19	26	M	NEGATIVE	YES	RESISTANT	POSITIVE
14893_2#44_H37Rv	2009-12-30	30	M	NEGATIVE	NO	SUSCEPTIBLE	POSITIVE
14893_2#45_H37Rv	2009-11-16	24	M	NEGATIVE	YES	RESISTANT	POSITIVE
14893_2#46_H37Rv	2009-11-25	29	F	NEGATIVE	NO	RESISTANT	POSITIVE
14893_2#47_H37Rv	2009-11-25	UNKNOWN	M	NEGATIVE	NO	RESISTANT	POSITIVE
14893_2#48_H37Rv	2009-12-15	68	M	NEGATIVE	YES	RESISTANT	POSITIVE
14893_2#49_H37Rv	2009-01-12	38	M	NEGATIVE	NO	RESISTANT	POSITIVE
14893_2#5_H37Rv	2009-10-09	70	M	NEGATIVE	NO	SUSCEPTIBLE	POSITIVE
14893_2#50_H37Rv	2009-01-12	28	M	NEGATIVE	NO	RESISTANT	POSITIVE
14893_2#51_H37Rv	2009-07-12	20	F	NEGATIVE	NO	RESISTANT	POSITIVE
14893_2#52_H37Rv	2009-12-17	20	F	NEGATIVE	YES	RESISTANT	POSITIVE
14893_2#53_H37Rv	2009-12-19	27	F	NEGATIVE	NO	RESISTANT	POSITIVE
14893_2#54_H37Rv	2009-12-21	19	M	NEGATIVE	NO	RESISTANT	POSITIVE
14893_2#55_H37Rv	2009-07-16	24	M	NEGATIVE	NO	RESISTANT	POSITIVE
14893_2#56_H37Rv	2009-07-30	33	F	NEGATIVE	NO	RESISTANT	POSITIVE
14893_2#57_H37Rv	2009-03-09	25	F	NEGATIVE	NO	SUSCEPTIBLE	POSITIVE
14893_2#58_H37Rv	2009-08-18	24	F	NEGATIVE	NO	RESISTANT	POSITIVE
14893_2#59_H37Rv	2009-08-09	34		NEGATIVE	NO	RESISTANT	POSITIVE
14893_2#6_H37Rv	2009-03-07	35	M	NEGATIVE	NO	RESISTANT	POSITIVE
14893_2#60_H37Rv	2009-03-12	18	F	NEGATIVE	NO	SUSCEPTIBLE	POSITIVE
14893_2#61_H37Rv	2009-05-18	23	F	NEGATIVE	NO	RESISTANT	POSITIVE
14893_2#62_H37Rv	2009-01-08	35	M	NEGATIVE	YES	RESISTANT	POSITIVE
14893_2#63_H37Rv	2009-01-08	20	M	NEGATIVE	NO	RESISTANT	NEGATIVE
14893_2#64_H37Rv	2009-08-19	24	M	NEGATIVE	NO	RESISTANT	POSITIVE
14893_2#65_H37Rv	2009-12-09	63	F	NEGATIVE	NO	RESISTANT	POSITIVE
14893_2#66_H37Rv	2009-11-18	35	M	NEGATIVE	NO	RESISTANT	POSITIVE
14893_2#67_H37Rv	2010-02-04	17	M	NEGATIVE	NO	RESISTANT	POSITIVE
14893_2#68_H37Rv	2011-02-09	43	M	POSITIVE	YES	RESISTANT	POSITIVE
14893_2#69_H37Rv	2011-02-07	22	F	NEGATIVE	NO	RESISTANT	POSITIVE
14893_2#7_H37Rv	2010-01-14	56	F	NEGATIVE	YES	RESISTANT	POSITIVE
14893_2#70_H37Rv	2011-01-19	63	F	NEGATIVE	NO	RESISTANT	POSITIVE
14893_2#71_H37Rv	2011-03-21	24	F	NEGATIVE	NO	RESISTANT	POSITIVE
14893_2#72_H37Rv	2011-03-30	26	F	NEGATIVE	YES	RESISTANT	POSITIVE
14893_2#73_H37Rv	2011-04-04	46	M	NEGATIVE	YES	RESISTANT	POSITIVE
14893_2#74_H37Rv	2011-04-19	38	M	NEGATIVE	NO	RESISTANT	POSITIVE
14893_2#75_H37Rv	2011-04-29	31	M	NEGATIVE	NO	RESISTANT	POSITIVE
14893_2#76_H37Rv	2011-02-01	44	F	NEGATIVE	YES	RESISTANT	POSITIVE
14893_2#77_H37Rv	2011-02-03	28	M	NEGATIVE	NO	RESISTANT	POSITIVE
14893_2#78_H37Rv	2011-02-15	53	M	NEGATIVE	YES	RESISTANT	POSITIVE
14893_2#79_H37Rv	2011-03-01	53	M	NEGATIVE	NO	RESISTANT	POSITIVE
14893_2#8_H37Rv	2009-08-15	38	M	NEGATIVE	YES	RESISTANT	POSITIVE
14893_2#80_H37Rv	2011-06-28	28	M	NEGATIVE	YES	RESISTANT	POSITIVE
14893_2#81_H37Rv	2011-04-20	21	M	POSITIVE	YES	RESISTANT	POSITIVE
14893_2#82_H37Rv	2007-04-25	23	F	NEGATIVE	NO	RESISTANT	POSITIVE
14893_2#83_H37Rv	2011-04-30	21	M	NEGATIVE	YES	RESISTANT	POSITIVE
14893_2#84_H37Rv	2011-05-10	73	M	NEGATIVE	NO	RESISTANT	UNKNOWN
14893_2#85_H37Rv	2011-05-30	13	F	NEGATIVE	NO	RESISTANT	POSITIVE
14893_2#86_H37Rv	2011-06-04	34	F	NEGATIVE	NO	RESISTANT	POSITIVE
14893_2#87_H37Rv	2011-06-28	52	F	NEGATIVE	NO	RESISTANT	POSITIVE
14893_2#88_H37Rv	2011-07-18	16	M	NEGATIVE	NO	RESISTANT	POSITIVE
14893_2#89_H37Rv	2011-07-19	19	F	NEGATIVE	NO	RESISTANT	POSITIVE
14893_2#9_H37Rv	2009-08-22	55	M	NEGATIVE	YES	RESISTANT	POSITIVE
14893_2#90_H37Rv	2011-04-26	19	M	NEGATIVE	NO	RESISTANT	POSITIVE
14893_2#91_H37Rv	2007-08-04	40	M	NEGATIVE	NO	RESISTANT	POSITIVE
14893_2#92_H37Rv	2011-08-01	14	F	NEGATIVE	NO	RESISTANT	POSITIVE
14893_2#93_H37Rv	2011-07-07	59	M	NEGATIVE	YES	RESISTANT	POSITIVE
14893_2#94_H37Rv	2011-11-15	20	F	NEGATIVE	NO	RESISTANT	UNKNOWN
14893_2#95_H37Rv	2011-12-16	78	M	NEGATIVE	YES	RESISTANT	POSITIVE
14893_3#65_H37Rv	2012-02-28	61	M	NEGATIVE	YES	RESISTANT	POSITIVE
14893_3#66_H37Rv	2012-04-11	22	F	NEGATIVE	YES	RESISTANT	POSITIVE
15277_3#50_H37Rv	2009-05-25	38	M	NEGATIVE	YES	RESISTANT	POSITIVE
15277_3#51_H37Rv	UNKNOWN	UNKNOWN	NA	NA	NA	UNKNOWN	UNKNOWN
15277_3#52_H37Rv	2009-06-23	24	F	NEGATIVE	NO	RESISTANT	NEGATIVE
15277_3#53_H37Rv	2009-07-08	26	M	NEGATIVE	NO	RESISTANT	NEGATIVE
15277_3#55_H37Rv	UNKNOWN	UNKNOWN	NA	NA	NA	UNKNOWN	UNKNOWN
15277_3#57_H37Rv	2009-10-09	23	M	NEGATIVE	NO	RESISTANT	POSITIVE
